# Supplementary material
Source: PubMed Central journal article supplement (PMC6648108)
Supplement: ao8b03406_si_001.pdf [file ao8b03406_si_001.pdf]

Supporting Information

# **Enhanced Removal of Veterinary Antibiotic Florfenicol by Cu-based Fenton-like Catalyst with Wide pH Adaptability and High Efficiency**

*Ting Chen<sup>a,c</sup>, Zhiliang Zhu<sup>a,c\*</sup>, Hua Zhang<sup>a</sup>, Xiaolin Shen<sup>a,c</sup>, Yanling Qiu<sup>b,c</sup> and Daqiang Yin<sup>b,c</sup>*

<sup>a</sup> State Key Laboratory of Pollution Control and Resource Reuse, Tongji University, Shanghai, 200092, China

<sup>b</sup> Key Laboratory of Yangtze River Water Environment, Ministry of Education, Tongji University, Shanghai 200092, China

<sup>c</sup> Shanghai Institute of Pollution Control and Ecological Safety

**Corresponding author:**

**Zhiliang Zhu, Professor**

**State Key Laboratory of Pollution Control and Resource Reuse,**

**Tongji University,**

**1239 Siping Road, Shanghai, 200092, China.**

**E-mail: [zxl@tongji.edu.cn](mailto:zxl@tongji.edu.cn)**

**Phone: +86-21-6598 2426, Fax: +86-21-6598 4626**

### **Text S1**

**Reusability.** To investigate the stability and reusability of the screened CuNiFeLa-2-LDH, the catalyst was filtered after each reaction and washed with ultrapure water more than 3 times until the pH of the supernatant reached 7.0. Then, the filtered powder was dried at 40 °C. The regenerated materials were used for five cycles to degrade the solution of 10 mg·L<sup>-1</sup> FF. During each cycle, the degradation efficiency was calculated by detecting the concentration of residual FF.

### **Text S2**

**ROS trapping.** For identifying the role of the reactive oxygen species (ROS) during the reaction process, tert-Butanol (TBA), p-benzoquinon (BQ), sodium azide (NaN<sub>3</sub>) were used as the scavengers of hydroxyl radicals ( $\bullet\text{OH}$ ), superoxide radical ( $\bullet\text{O}_2^-$ ) and singlet oxygen ( $\text{O}_2^1$ ). The signal of hydroxyl radicals was detected by photoluminescence (PL) emission spectra using a benzoic acid method at room temperature with the excitation wavelength at 316 nm.<sup>1</sup> Briefly, a certain amount of catalyst was mixed with 50 mL of benzoic acid (10 mmol·L<sup>-1</sup>), FF (10 mg·L<sup>-1</sup>) and H<sub>2</sub>O<sub>2</sub> (5 mmol · L<sup>-1</sup>) solution. After the beginning of the reaction, a certain amount of supernatant was taken from the reactor at a designed time intervals, and then the filtered solution was analyzed by PL emission spectroscopy to indirectly measure the amount of hydroxyl radicals.

### **Text S3**

**ESR measurement.** In addition, the electron spin resonance (ESR) spectra with DMPO ( $\cdot\text{OH}$ ,  $\cdot\text{O}_2^-$ ) and TEMP ( $\text{O}_2^{\cdot 1}$ ) as trapping reagents was used to detect the ROS on a Miniscope MS-5000 ESR spectrometer (microwave frequency: 9.47 GHz; microwave power: 10 mW; modulation: 0.2 mT; and sweep time: 60 s). The signal of  $\cdot\text{OH}$ ,  $\cdot\text{O}_2^-$  and  $\text{O}_2^{\cdot 1}$  with and without catalyst or  $\text{H}_2\text{O}_2$  were detected in the aqueous solution and DMSO solution, respectively. In a typical procedure, the ESR measurement of each sample was prepared by adding 5 mg catalyst to 2 mL water or DMSO. Then, 1 mL of the above suspension, 5  $\mu\text{L}$  DMPO and 10  $\mu\text{L}$   $\text{H}_2\text{O}_2$  (30%, w/w) were mixed. After 5 min, the ESR spectra was recorded on the ESR spectrometer.

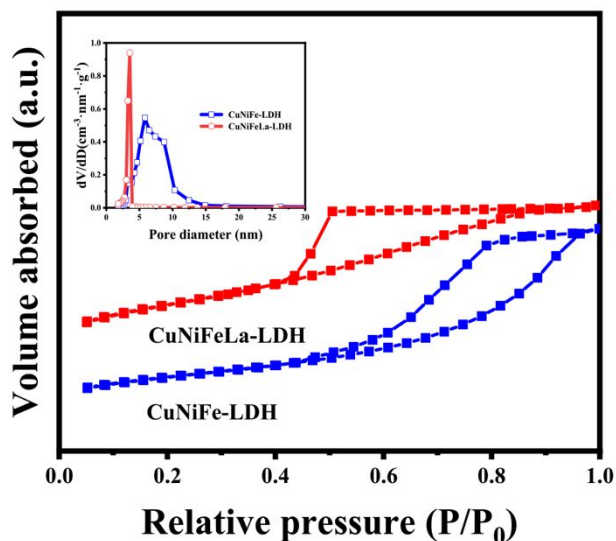

**Figure S1.**  $\text{N}_2$  adsorption-desorption isotherms for CuNiFe-LDH, CuNiFeLa-2-LDH (the inset represents pore size distribution calculated from the desorption branch data by the BJH method).

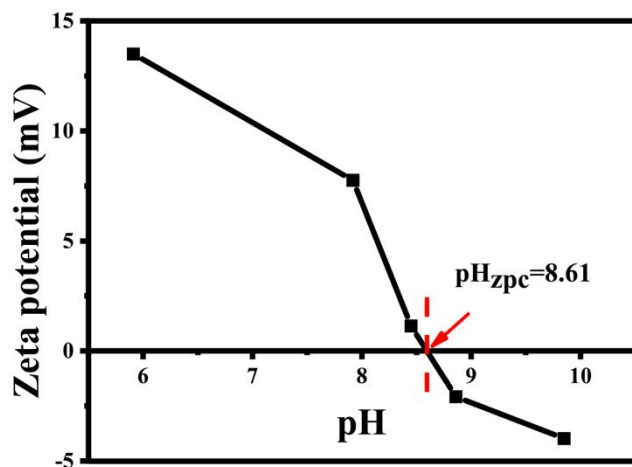

**Figure S2.** Zeta potential of CuNiFeLa-2-LDH

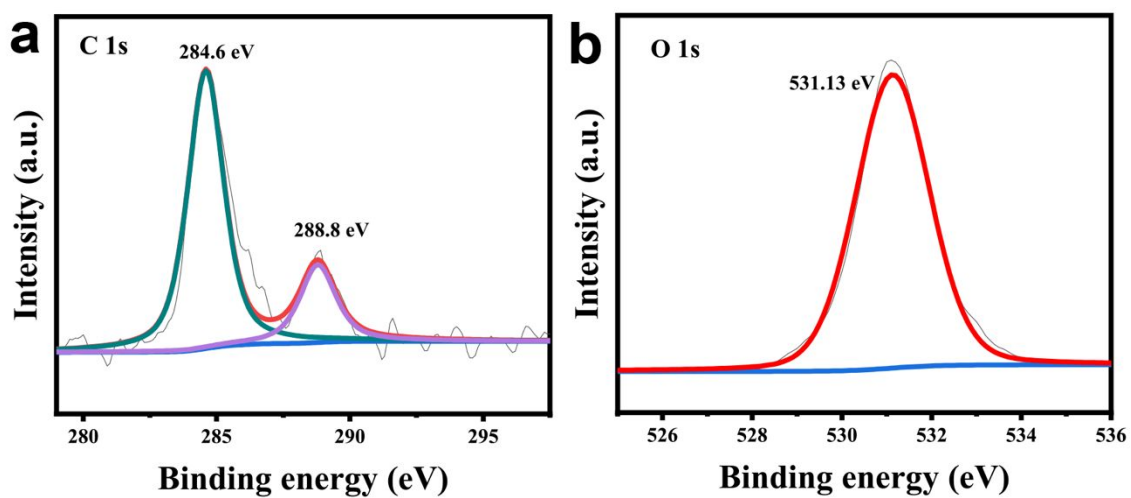

**Figure S3.** The high resolution XPS spectrum of CuNiFeLa-2-LDH (a) C 1s and (b) O 1s.

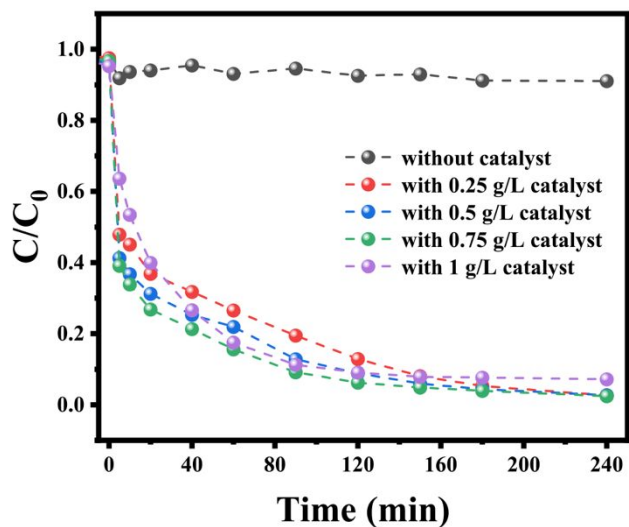

**Figure S4.** Effects of catalyst dosage on degradation of FF by CuNiFeLa-2-LDH. Conditions:

$[\text{H}_2\text{O}_2]=5 \text{ mmol}\cdot\text{L}^{-1}$ ,  $[\text{FF}]=10 \text{ mg L}^{-1}$ , natural pH.

**Table S1. Chemical composition analysis of La-doped CuNiFe-LDHs**

| Materials      | $m(\text{Cu})$<br>a% | $m(\text{Ni})$<br>a% | $m(\text{Fe})$<br>a% | $m(\text{La})$<br>a% | $M(\text{Cu}/\text{Ni}/\text{Fe}/\text{La})^b$ | Chemical composition                                                                                                                                            |
|----------------|----------------------|----------------------|----------------------|----------------------|------------------------------------------------|-----------------------------------------------------------------------------------------------------------------------------------------------------------------|
| CuNiFeLa-1-LDH | 6.83                 | 18.68                | 11.14                | 1.38                 | 1:2.96:1.85:0.09                               | $[\text{Cu}^{2+}_{0.17}\text{Ni}^{2+}_{0.50}\text{Fe}^{3+}_{0.31}\text{La}^{3+}_{0.02}(\text{OH})_2]^{0.33+}(\text{CO}_3^{2-})_{0.165}\cdot\text{mH}_2\text{O}$ |
| CuNiFeLa-2-LDH | 6.99                 | 19.00                | 10.34                | 2.41                 | 1:2.94:1.68:0.16                               | $[\text{Cu}^{2+}_{0.17}\text{Ni}^{2+}_{0.51}\text{Fe}^{3+}_{0.29}\text{La}^{3+}_{0.03}(\text{OH})_2]^{0.32+}(\text{CO}_3^{2-})_{0.16}\cdot\text{mH}_2\text{O}$  |
| CuNiFeLa-3-LDH | 6.16                 | 16.64                | 8.08                 | 4.08                 | 1:2.93:1.49:0.30                               | $[\text{Cu}^{2+}_{0.17}\text{Ni}^{2+}_{0.51}\text{Fe}^{3+}_{0.26}\text{La}^{3+}_{0.06}(\text{OH})_2]^{0.32+}(\text{CO}_3^{2-})_{0.16}\cdot\text{mH}_2\text{O}$  |
| CuNiFeLa-4-LDH | 5.93                 | 15.85                | 6.00                 | 14.09                | 1:2.89:1.15:1.09                               | $[\text{Cu}^{2+}_{0.16}\text{Ni}^{2+}_{0.47}\text{Fe}^{3+}_{0.19}\text{La}^{3+}_{0.18}(\text{OH})_2]^{0.37+}(\text{CO}_3^{2-})_{0.185}\cdot\text{mH}_2\text{O}$ |

<sup>a</sup> Mass content of Cu, Ni, Fe or La in the material.

<sup>b</sup> Cu/Ni/Fe/La molar ratio.

**Table S2. EDS results of element analysis**

| El     | AN | Series   | Unn. C wt. % | Norm. C wt. % | Atom. C at. % | Error wt. % |
|--------|----|----------|--------------|---------------|---------------|-------------|
| O      | 8  | K-series | 35.65        | 38.23         | 55.29         | 4.5         |
| C      | 6  | K-series | 12.89        | 13.83         | 26.64         | 2.4         |
| Ni     | 28 | K-series | 21.46        | 23.01         | 9.08          | 0.6         |
| Fe     | 26 | K-series | 11.14        | 11.95         | 4.95          | 0.3         |
| Cu     | 29 | K-series | 8.84         | 9.48          | 3.45          | 0.3         |
| La     | 57 | L-series | 3.27         | 3.51          | 0.58          | 0.1         |
| Total: |    |          | 93.26        | 100.00        | 100.00        |             |

## REFERENCES

(1) Zhou, L.; Lei, J. Y.; Wang, L. Z.; Liu, Y. D.; Zhang, J. L., Highly efficient photo-Fenton degradation of methyl orange facilitated by slow light effect and hierarchical porous structure of Fe<sub>2</sub>O<sub>3</sub>-SiO<sub>2</sub> photonic crystals. *Appl. Catal. B: Environ.* **2018**, 237, 1160-1167.
